# Supplementary material for: Challenges Facing First-Generation College Graduates in Medical School: A Qualitative Analysis
Source: PubMed Central journal article supplement (PMC10719755; doi:10.1001/jamanetworkopen.2023.47528), 2023-12-13
Supplement: jamanetwopen-e2347528-s002.pdf [file jamanetwopen-e2347528-s002.pdf]

## Data Sharing Statement

Havemann. Challenges Facing First-Generation College Graduates in Medical School: A Qualitative Analysis. *JAMA Netw Open*. Published December 13, 2023.  
doi:10.1001/jamanetworkopen.2023.47528

### Data

**Data available:** No

### Additional Information

**Explanation for why data not available:** Privacy of vulnerable student population
